# Supplementary material for: Analysis of transcripts differentially expressed between fruited and deflowered ‘Gala’ adult trees: a contribution to biennial bearing understanding in apple
Source: PubMed Central journal article supplement (PMC4770685; doi:10.1186/s12870-016-0739-y), 2016-02-29

**Figure S3** : Validation of microarray relative expression (log2 ratio) by expression of selected candidate genes by RT-qPCR.

| MDP number    | Gene annotation | Day | Treatment | qPCR relative expression to <i>HistoneH3</i> | Microarray relative expression (log2 ratio) |
|---------------|-----------------|-----|-----------|----------------------------------------------|---------------------------------------------|
| MDP0000492089 | <i>AFL1</i>     | 131 | OFF       | 0.311983                                     | 3.7                                         |
| MDP0000492089 | <i>AFL1</i>     | 151 | OFF       | 0.302650                                     | 3.95                                        |
| MDP0000492089 | <i>AFL1</i>     | 222 | OFF       | 1.011256                                     | 4.57                                        |
| MDP0000492089 | <i>AFL1</i>     | 131 | ON        | 0.258740                                     | 3.38                                        |
| MDP0000492089 | <i>AFL1</i>     | 151 | ON        | 0.376367                                     | 3.68                                        |
| MDP0000492089 | <i>AFL1</i>     | 222 | ON        | 0.946711                                     | 4.48                                        |
| MDP0000186703 | <i>AFL2</i>     | 131 | OFF       | 0.026533                                     | 3.25                                        |
| MDP0000186703 | <i>AFL2</i>     | 151 | OFF       | 0.015800                                     | 3.08                                        |
| MDP0000186703 | <i>AFL2</i>     | 222 | OFF       | 0.032500                                     | 3.75                                        |
| MDP0000186703 | <i>AFL2</i>     | 131 | ON        | 0.020960                                     | 3.09                                        |
| MDP0000186703 | <i>AFL2</i>     | 151 | ON        | 0.016925                                     | 2.83                                        |
| MDP0000186703 | <i>AFL2</i>     | 222 | ON        | 0.034538                                     | 3.91                                        |
| MDP0000013331 | <i>MdAP1a</i>   | 131 | OFF       | 0.007789                                     | -0.09                                       |
| MDP0000013331 | <i>MdAP1a</i>   | 151 | OFF       | 0.006417                                     | 0.61                                        |
| MDP0000013331 | <i>MdAP1a</i>   | 222 | OFF       | 0.189250                                     | 3.55                                        |
| MDP0000013331 | <i>MdAP1a</i>   | 131 | ON        | 0.006136                                     | -0.17                                       |
| MDP0000013331 | <i>MdAP1a</i>   | 151 | ON        | 0.003916                                     | -0.11                                       |
| MDP0000013331 | <i>MdAP1a</i>   | 222 | ON        | 0.088950                                     | 2.37                                        |
| MDP0000269921 | <i>MdAP1b</i>   | 131 | OFF       | 0.000505                                     | 0.44                                        |
| MDP0000269921 | <i>MdAP1b</i>   | 151 | OFF       | 0.001337                                     | 1.32                                        |
| MDP0000269921 | <i>MdAP1b</i>   | 222 | OFF       | 0.008507                                     | 3.5                                         |
| MDP0000269921 | <i>MdAP1b</i>   | 131 | ON        | 0.000094                                     | 0.46                                        |
| MDP0000269921 | <i>MdAP1b</i>   | 151 | ON        | 0.001116                                     | 0.85                                        |
| MDP0000269921 | <i>MdAP1b</i>   | 222 | ON        | 0.006606                                     | 2.58                                        |
| MDP0000132050 | <i>MdFT1</i>    | 131 | OFF       | 0.003238                                     | 3.44                                        |
| MDP0000132050 | <i>MdFT1</i>    | 151 | OFF       | 0.004791                                     | 3.73                                        |
| MDP0000132050 | <i>MdFT1</i>    | 222 | OFF       | 0.011980                                     | 4.52                                        |
| MDP0000132050 | <i>MdFT1</i>    | 131 | ON        | 0.003745                                     | 3.45                                        |
| MDP0000132050 | <i>MdFT1</i>    | 151 | ON        | 0.005926                                     | 4.35                                        |
| MDP0000132050 | <i>MdFT1</i>    | 222 | ON        | 0.009844                                     | 4.39                                        |
| MDP0000128821 | <i>MdFT2</i>    | 131 | OFF       | 0.000283                                     | 2.52                                        |
| MDP0000128821 | <i>MdFT2</i>    | 151 | OFF       | 0.000304                                     | 2.79                                        |
| MDP0000128821 | <i>MdFT2</i>    | 222 | OFF       | 0.000922                                     | 3.7                                         |
| MDP0000128821 | <i>MdFT2</i>    | 131 | ON        | 0.000300                                     | 2.73                                        |
| MDP0000128821 | <i>MdFT2</i>    | 151 | ON        | 0.000548                                     | 3.19                                        |
| MDP0000128821 | <i>MdFT2</i>    | 222 | ON        | 0.001277                                     | 3.67                                        |
| MDP0000255437 | <i>MdTFL1</i>   | 131 | OFF       | 0.023282                                     | 2.95                                        |
| MDP0000255437 | <i>MdTFL1</i>   | 151 | OFF       | 0.014114                                     | 2.55                                        |
| MDP0000255437 | <i>MdTFL1</i>   | 222 | OFF       | 0.000910                                     | 0.39                                        |
| MDP0000255437 | <i>MdTFL1</i>   | 131 | ON        | 0.025090                                     | 2.97                                        |
| MDP0000255437 | <i>MdTFL1</i>   | 151 | ON        | 0.016196                                     | 2.78                                        |
| MDP0000255437 | <i>MdTFL1</i>   | 222 | ON        | 0.005751                                     | 0.96                                        |

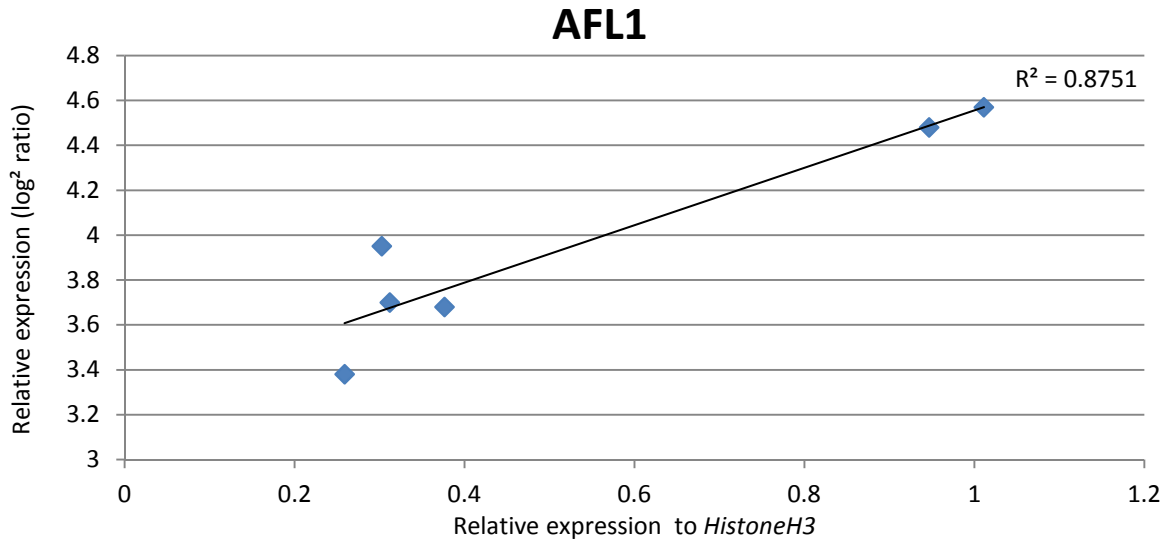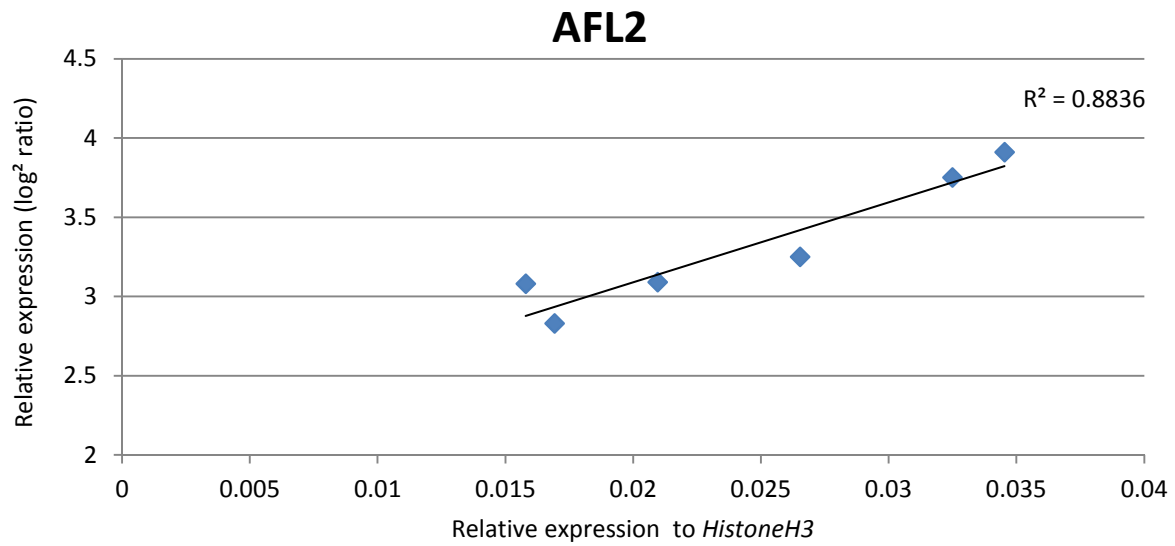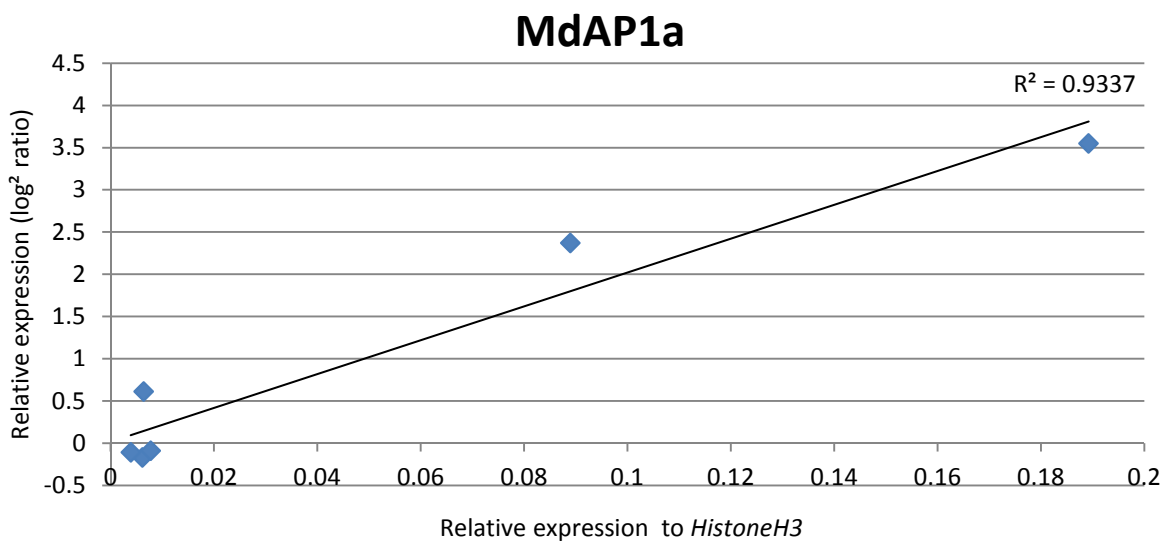

### MdAP1b

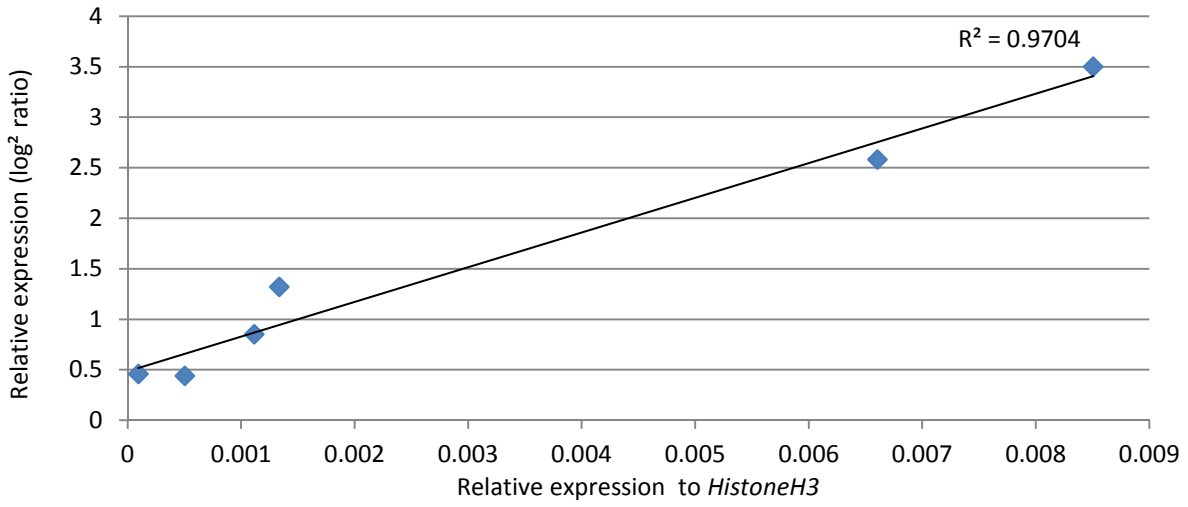

### MdFT1

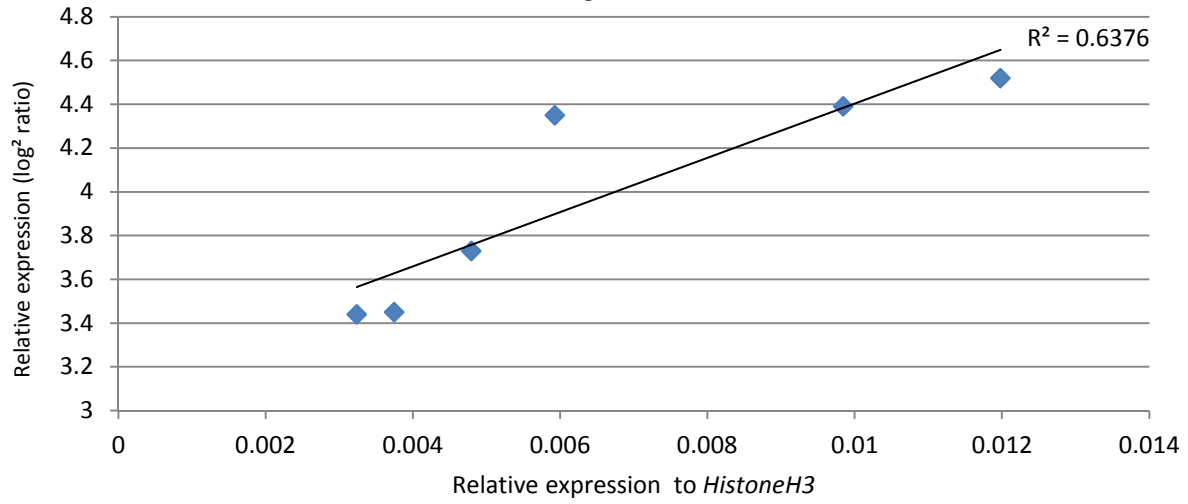

### MdFT2

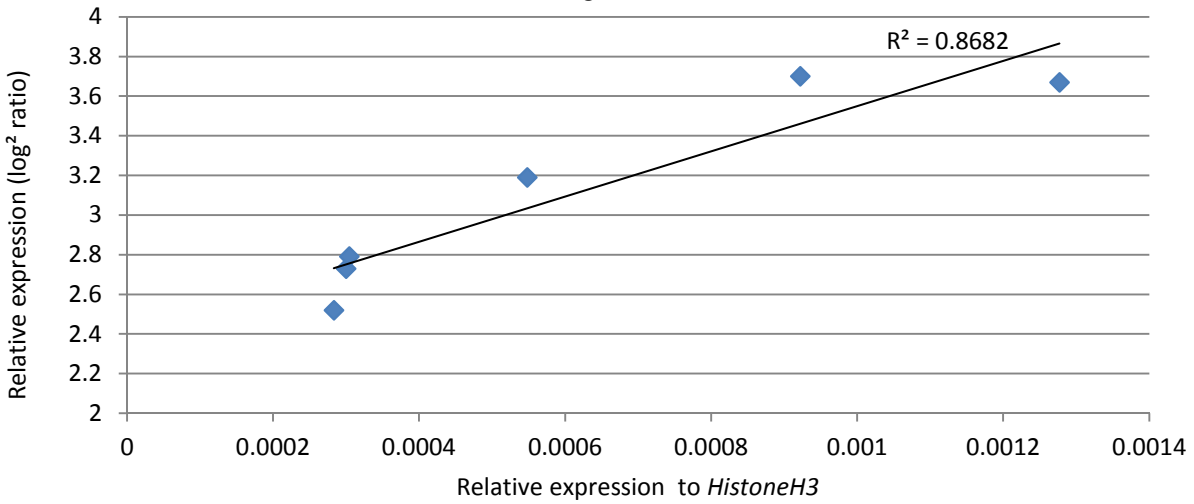

# MdTFL1

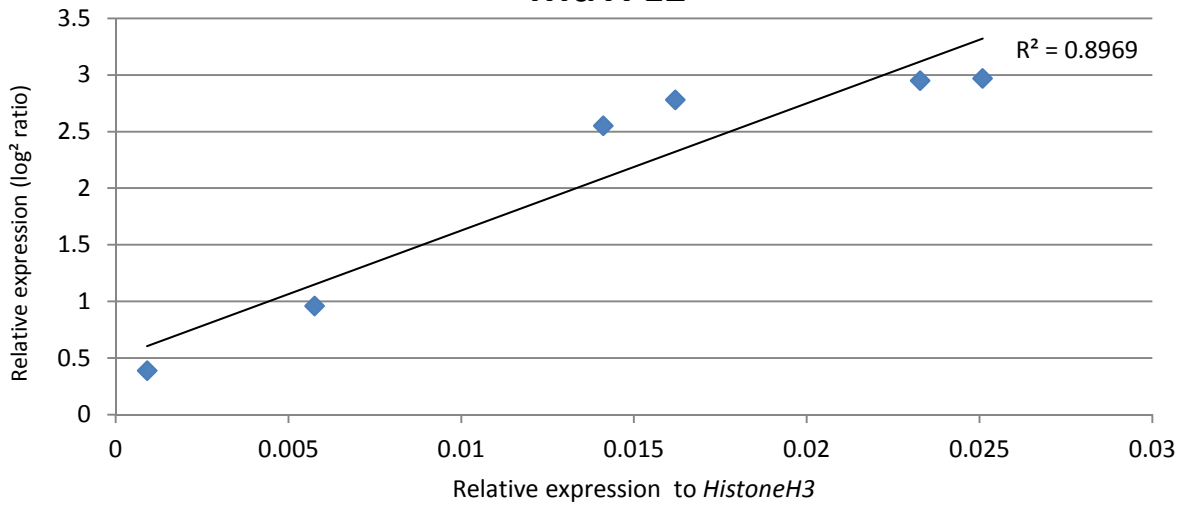

Supplement: 12870_2016_739_MOESM4_ESM.pdf [file 12870_2016_739_MOESM4_ESM.pdf]
