# Supplementary material for: Analysis of transcripts differentially expressed between fruited and deflowered ‘Gala’ adult trees: a contribution to biennial bearing understanding in apple
Source: PubMed Central journal article supplement (PMC4770685; doi:10.1186/s12870-016-0739-y), 2016-02-29
Supplement: 12870_2016_739_MOESM3_ESM.pdf [file 12870_2016_739_MOESM3_ESM.pdf]

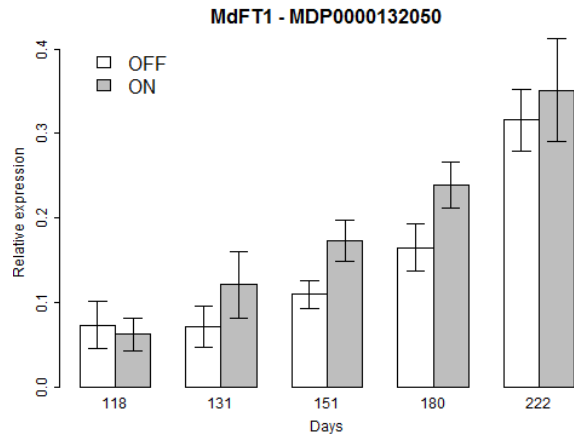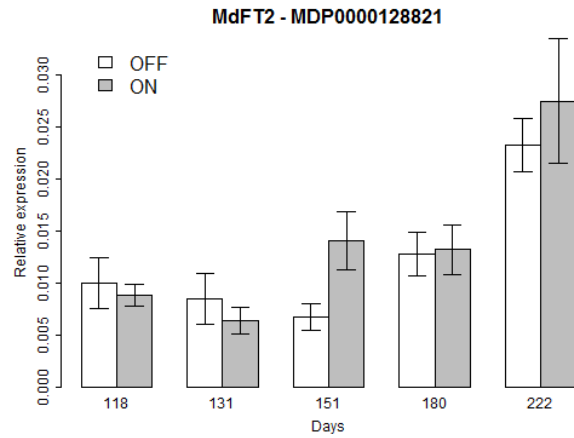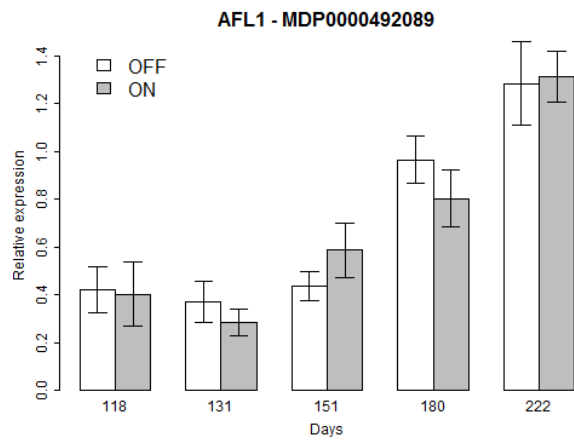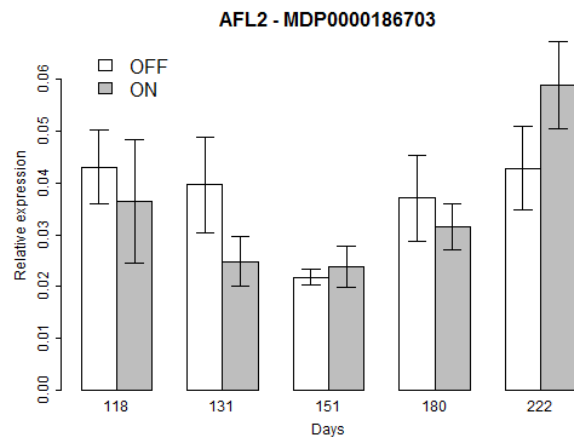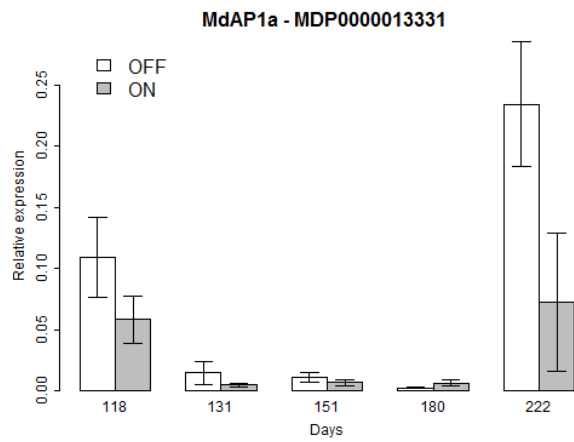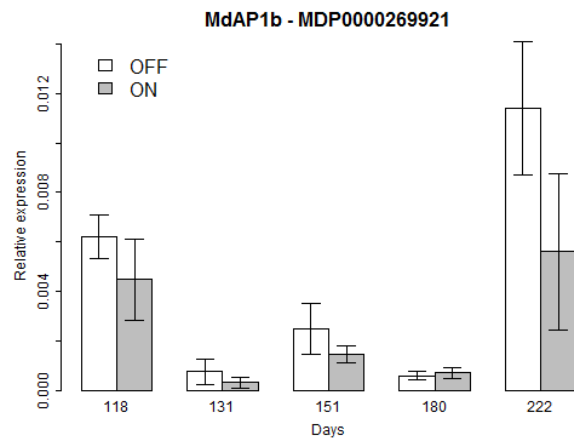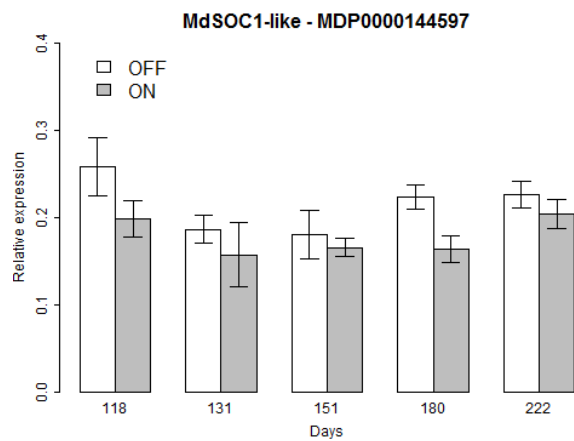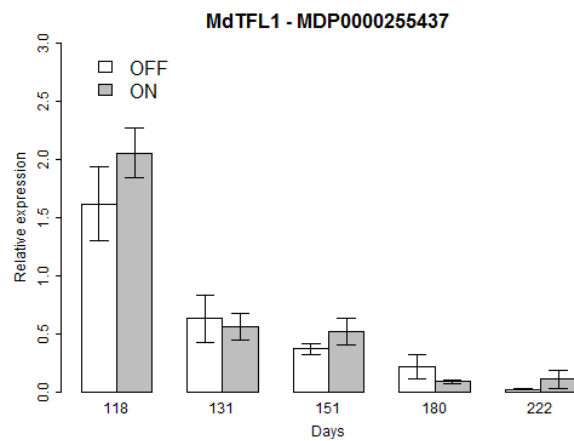

**Figure S2.** Expression pattern of *MdFT1*, *MdFT2*, *AFL1*, *AFL2*, *MdAP1a*, *MdAP1b*, *MdSOC1-like* and *MdTFL1* during the growing season in 'Gala' apple trees measured by quantitative real-time PCR using spur apical buds harvested at day 118, 131, 151, 180 and 222.

Comparison was made between expression levels of spur apical buds of apple trees bearing no crop ('OFF'), heavy crop ('ON') in 2010. Graphics represent the average of the nine data points per date per treatment with associated standard deviation. Relative expression was calculated using the  $\alpha$ -*ACTIN* housekeeping gene.
